# Supplementary material
Source: Springer Nature journal article supplement (https://www.springermedizin.de/resource/supplementary/12883_2010_420_MOESM4_ESM.pdf/9455366)

# Data variables used in linkage algorithm

## OSHPD Patient Discharge Data

Date of Birth  
Gender  
Race  
Ethnicity  
ZIP Code of Residence  
County of Residence  
Hospital ID Number  
Hospital ZIP Code  
Hospital County  
Admission Date  
Admission Year  
Admission Day of Week, Month & Year

## OSHPD Emergency Department Data

( Same variables as listed in Patient Discharge Data)

## Santa Clara EMS data

Date of birth  
gender  
race  
Zip Code of residence  
County of Caller Residence  
County in which destination hospital is located  
Name/ID of Destination Hospital  
Service date/month/year  
Destination Hospital (Street/ZIP Code)  
Hospital Arrival Time (00:00)

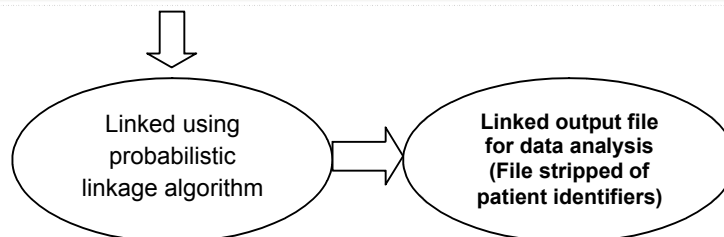

Supplement: MOESM4 [file 9455366]
